# Supplementary material for: Soluble urokinase plasminogen activator receptor (suPAR) in acute care: a strong marker of disease presence and severity, readmission and mortality. A retrospective cohort study
Source: PubMed Central journal article supplement — Emerg Med J. 2016 Sep 2;33(11):769–75. doi: 10.1136/emermed-2015-205444 (PMC5136705; doi:10.1136/emermed-2015-205444), 2016-09-02
Supplement: emermed-2015-205444_tables.pdf [file emermed-2015-205444_tables.pdf]

---

**Table S1** Standard biomarkers routinely analysed in patients admitted to the Acute Medical Unit

---

|                                    |                                                   |
|------------------------------------|---------------------------------------------------|
| Alanine aminotransferase           | Haemoglobin                                       |
| Albumin                            | International normalised ratio (INR)              |
| Alkaline phosphatase               | K <sup>+</sup>                                    |
| Bilirubin                          | Leukocytes                                        |
| Carbamide                          | Leukocytes differential count                     |
| CO <sub>2</sub>                    | Mean corpuscular haemoglobin concentration (MCHC) |
| Coagulation factors II, VII, and X | Mean corpuscular volume (MCV)                     |
| Creatinine                         | Na <sup>+</sup>                                   |
| C-reactive protein (CRP)           | Thrombocytes                                      |

---

**Table S2** Boundaries in age- and sex-specific suPAR quartiles

| Age (years) | Women |     |     |     |      | Men |     |     |     |      |
|-------------|-------|-----|-----|-----|------|-----|-----|-----|-----|------|
|             | 0%    | 25% | 50% | 75% | 100% | 0%  | 25% | 50% | 75% | 100% |
| <50         | 0.6   | 1.8 | 2.3 | 2.9 | 15.2 | 0.9 | 1.7 | 2.2 | 3.0 | 15.2 |
| 50-70       | 1.0   | 2.3 | 3.0 | 3.9 | 23.5 | 0.6 | 2.2 | 3.1 | 4.6 | 23.1 |
| >70         | 1.4   | 3.2 | 4.3 | 6.2 | 26.6 | 1.3 | 3.3 | 4.4 | 6.1 | 19.6 |

**Table S3** Hazard ratios (95% CI) for readmission and mortality in the fully adjusted model with log-transformed suPAR, age, sex, Charlson score, and CRP

|                | Readmission            |                        | Mortality              |                        |
|----------------|------------------------|------------------------|------------------------|------------------------|
|                | 30 days                | 90 days                | 30 days                | 90 days                |
| log2(suPAR)    | 1.50 (1.35 to 1.67)    | 1.47 (1.35 to 1.60)    | 2.53 (2.10 to 3.04)    | 2.46 (2.14 to 2.84)    |
| Male sex       | 1.20 (1.04 to 1.39)    | 1.18 (1.06 to 1.33)    | 1.08 (0.82 to 1.42)    | 1.24 (1.01 to 1.52)    |
| Age            | 1.01 (1.00 to 1.01)    | 1.01 (1.00 to 1.01)    | 1.05 (1.04 to 1.06)    | 1.05 (1.04 to 1.06)    |
| Charlson score | 1.09 (1.01 to 1.17)    | 1.07 (1.00 to 1.14)    | 1.31 (1.21 to 1.42)    | 1.34 (1.26 to 1.43)    |
| CRP            | 0.999 (0.998 to 1.000) | 0.999 (0.998 to 1.000) | 1.004 (1.003 to 1.005) | 1.003 (1.002 to 1.004) |
